# Supplementary material for: Therapy‐resistant and ‐sensitive lncRNAs, SNHG1 and UBL7‐AS1 promote glioblastoma cell proliferation
Source: Hindawi journal article supplement (doi:10.1155/2022/2623599), 2022-01-01
Supplement: f1 [file 2623599.f1.pdf]

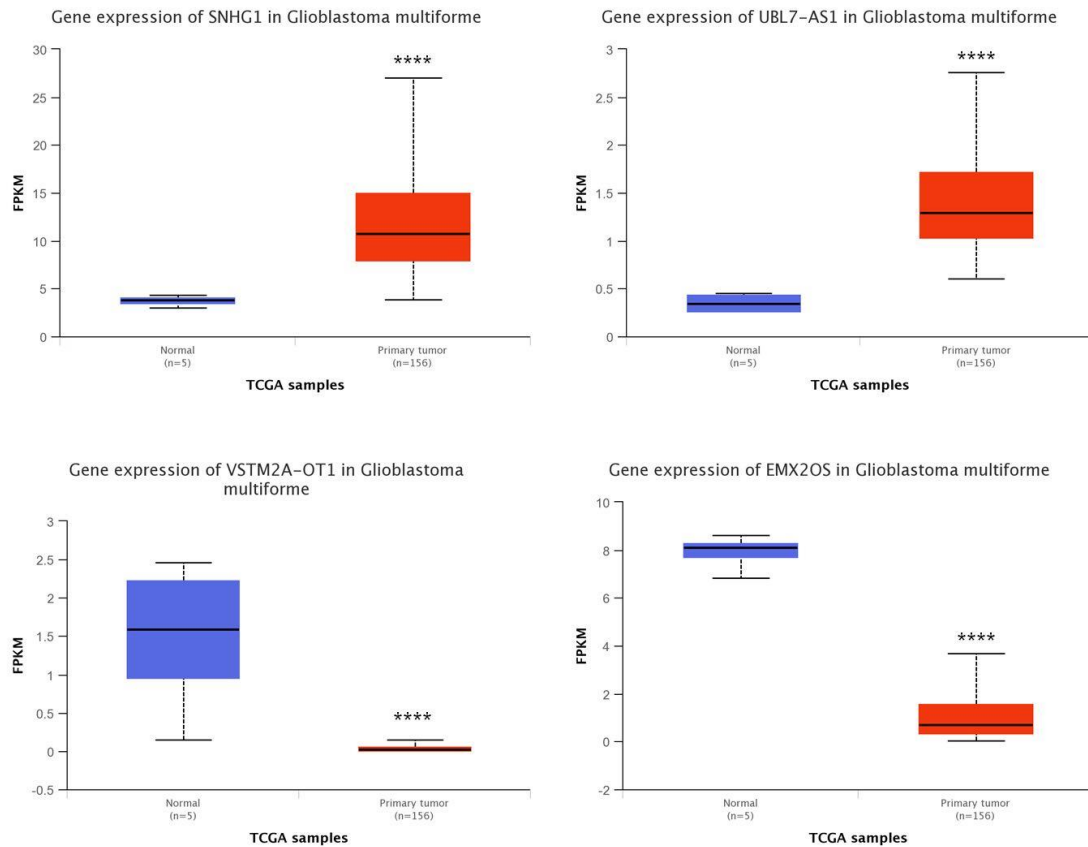

**Supplemental FIGURE 1. Expression of SNHG1, UBL7-AS1, VSTM2A-OT1 and EMX2OS in GBM patient samples as determined by analysis of the UALCAN portal.**

**(A)** Gene expression of SNHG1 in Glioblastoma multiforme. **(B)** Gene expression of UBL7-AS1 in Glioblastoma multiforme. **(C)** Gene expression of VSTM2A-OT1 in Glioblastoma multiforme. **(D)** Gene expression of EMX2OS in Glioblastoma multiforme. P-values were calculated using one-way ANOVA where:\*\*\*\*  $p < 0.0001$ .
