# Supplementary material for: Therapy‐resistant and ‐sensitive lncRNAs, SNHG1 and UBL7‐AS1 promote glioblastoma cell proliferation
Source: Hindawi journal article supplement (doi:10.1155/2022/2623599), 2022-01-01
Supplement: f2 [file 2623599.f2.pdf]

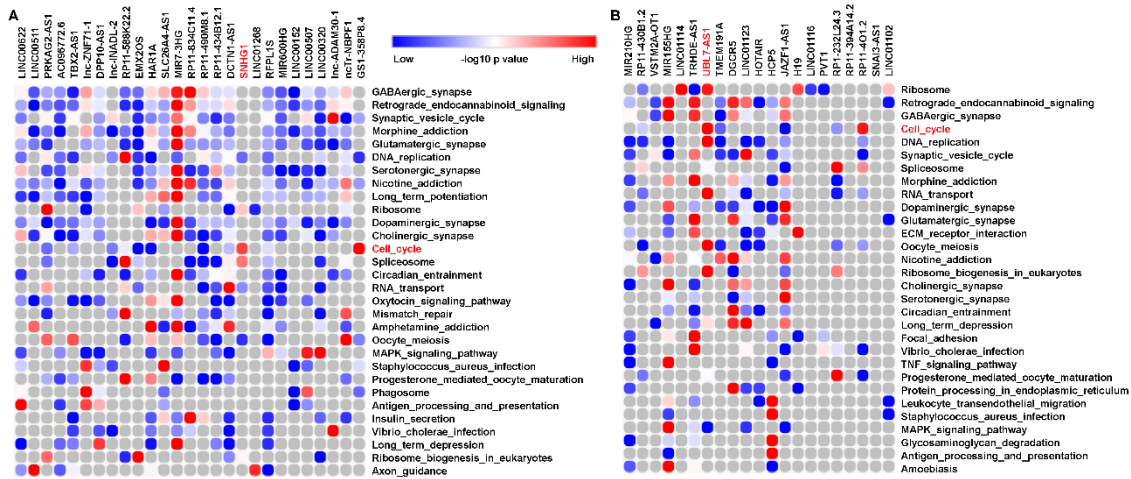

**Supplemental FIGURE 2. Expression levels of glioblastoma-associated lncRNAs correlate with the expressions of cell-cycle genes.**

**(A)** Top 30 KEGG pathways significantly correlated with the expression of therapy-resistant lncRNAs. **(B)** Top 30 KEGG pathways significantly correlated with the expression of therapy reversed lncRNAs. Each column corresponds to a single lncRNA, and each row corresponds to a KEGG pathway with an overrepresentation of genes correlating with lncRNA ( $p \leq 0.01$ ). The pathways were ranked by the sum of the negative log<sub>10</sub> p-value of each lncRNA for each pathway. Top 30 pathways are shown.
