# Supplementary material for: Therapy‐resistant and ‐sensitive lncRNAs, SNHG1 and UBL7‐AS1 promote glioblastoma cell proliferation
Source: Hindawi journal article supplement (doi:10.1155/2022/2623599), 2022-01-01
Supplement: f3 [file 2623599.f3.pdf]

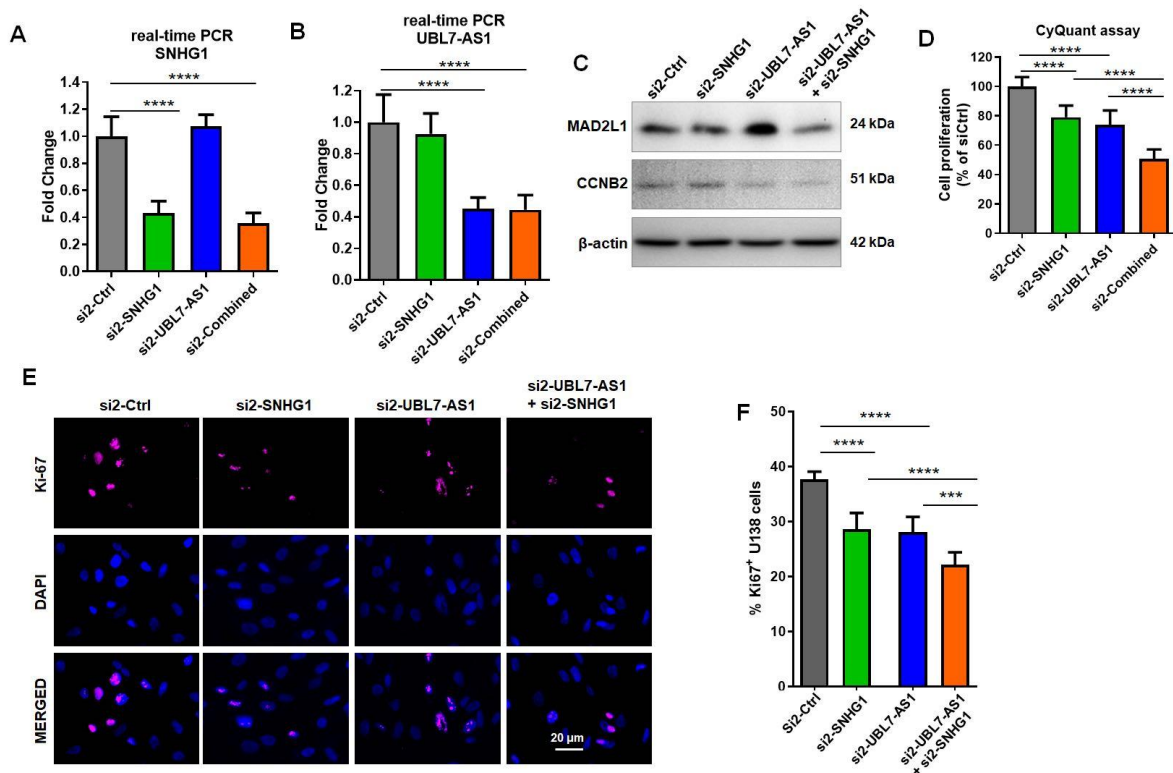

**Supplemental FIGURE 3. Knockdown of SNHG1 and UBL7-AS1 decreases proliferation of U138MG cells.**

**(A and B)** Real-time PCR analysis of the expression of SNHG1 (A) and UBL7-AS1 (B) in U138MG cells transfected with siRNA to SNHG1, UBL7-AS1 or both. **(C)** Western blotting analysis of the expression of MAD2L1 and CCNB2 in U138MG cells transfected with siRNAs to SNHG1, UBL7-AS1 or both. **(D)** Cell proliferation analysis in U138MG cells transfected with siRNAs to SNHG1, UBL7-AS1 or both using the CyQUANT assay. **(E)** Immunostaining for Ki67 in U138MG cells transfected with siRNAs to SNHG1, UBL7-AS1 or both. **(F)** Quantification of the results in E. P-values were calculated using on-way ANOVA where: \*\*\*  $p < 0.001$ , \*\*\*\*  $p < 0.0001$ .
