# Supplementary material for: Therapy‐resistant and ‐sensitive lncRNAs, SNHG1 and UBL7‐AS1 promote glioblastoma cell proliferation
Source: Hindawi journal article supplement (doi:10.1155/2022/2623599), 2022-01-01
Supplement: f4 [file 2623599.f4.pdf]

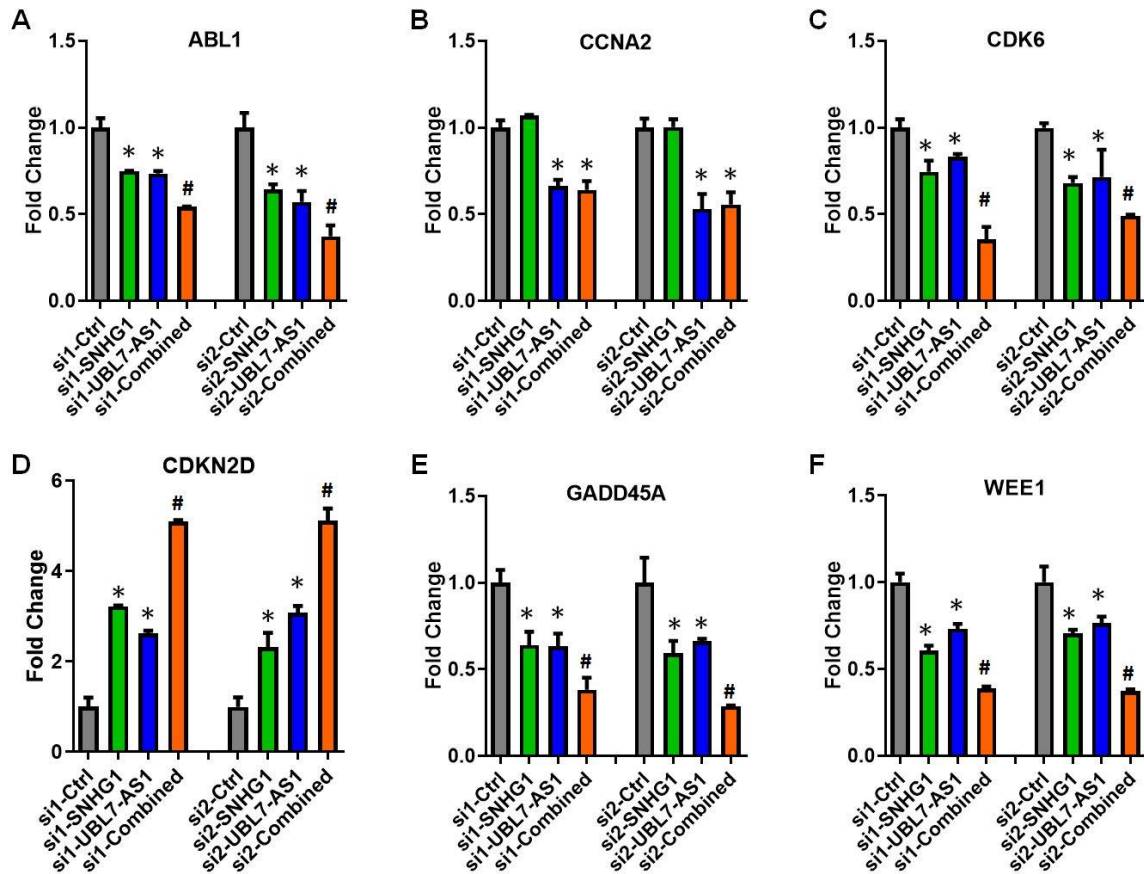

**Supplemental FIGURE 4. lncRNAs SNHG1 and UBL7-AS1 cell cycle-related genes in U138MG cells.**

(A - F) Real-time PCR analysis of the expression of cell cycle-related genes in U138MG cells transfected with siRNA to SNHG1, UBL7-AS1 or both. P-values were calculated using on-way ANOVA where: \*  $p < 0.05$  vs control, #  $p < 0.05$  vs siRNA-SNHG1 and siRNA-UBL7-AS1.
