# Supplementary material for: Therapy‐resistant and ‐sensitive lncRNAs, SNHG1 and UBL7‐AS1 promote glioblastoma cell proliferation
Source: Hindawi journal article supplement (doi:10.1155/2022/2623599), 2022-01-01
Supplement: f5 [file 2623599.f5.pdf]

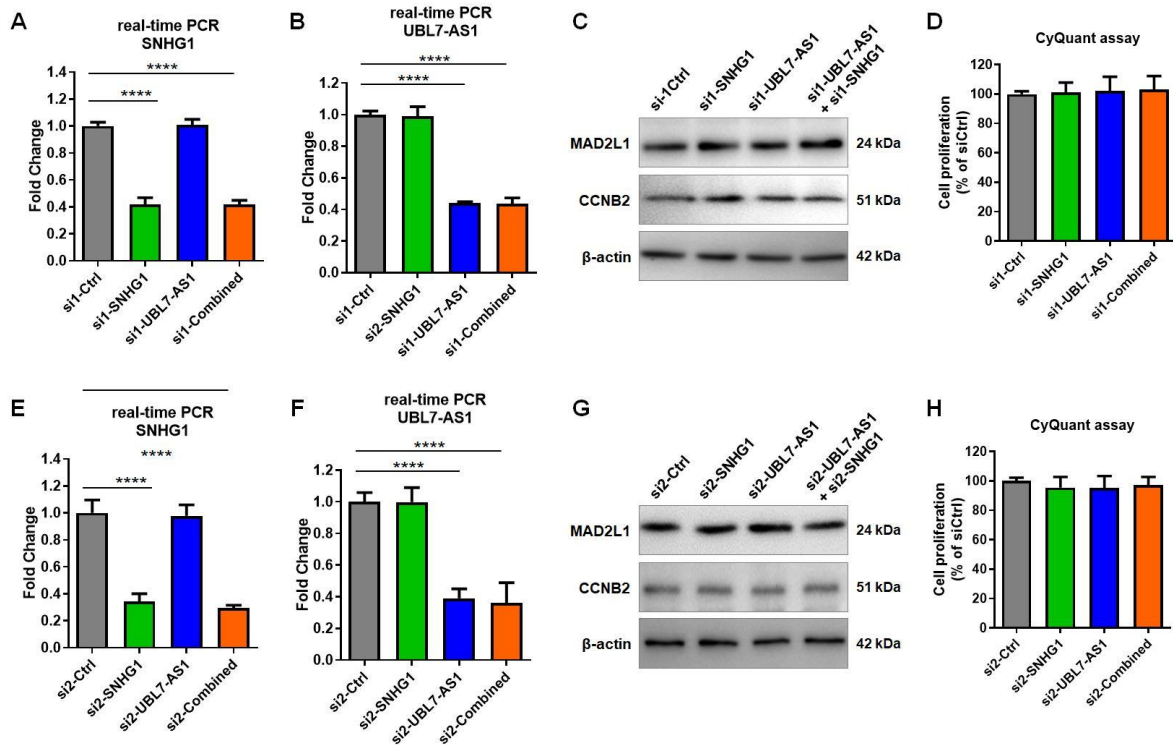

**Supplemental FIGURE 5. Knockdown of SNHG1 and UBL7-AS1 doesn't affect proliferation of human primary astrocytes.**

**(A, B, E, F)** Real-time PCR analysis of the expression of SNHG1 (A) and UBL7-AS1 (B) in human primary astrocytes transfected with siRNA to SNHG1, UBL7-AS1 or both. **(C, G)** Western blotting analysis of the expression of MAD2L1 and CCNB2 in human primary astrocytes transfected with siRNAs to SNHG1, UBL7-AS1 or both. **(D, H)** Cell proliferation analysis in human primary astrocytes transfected with siRNAs to SNHG1, UBL7-AS1 or both using the CyQUANT assay. P-values were calculated using on-way ANOVA where: \*\*\*  $p < 0.001$ , \*\*\*\*  $p < 0.0001$ .
