# Supplementary material for: Therapy‐resistant and ‐sensitive lncRNAs, SNHG1 and UBL7‐AS1 promote glioblastoma cell proliferation
Source: Hindawi journal article supplement (doi:10.1155/2022/2623599), 2022-01-01
Supplement: f6 [file 2623599.f6.pdf]

**Supplemental Table 1:** The statistics and description of the datasets used in this study

| GEO Datasets | Samples                                                                                                                                                                                | References |
|--------------|----------------------------------------------------------------------------------------------------------------------------------------------------------------------------------------|------------|
| GSE50161     | 13 normal brain samples, 46 ependymomas, 34 GBM, 22 medulloblastomas, and 15 pilocytic astrocytoma                                                                                     | [18]       |
| GSE4290      | 23 non-tumor samples from epilepsy patients, 26 astrocytomas, 50 oligodendrogliomas, and 81 GBM.                                                                                       | [19]       |
| GSE7696      | 28 GBM specimen of patients treated with radiotherapy, 52 GBM specimen of patients treated with adjuvant temozolomide (TMZ) and radiotherapy, and 4 samples of non-tumor brain tissues | [20,21]    |
