# Supplementary material for: Therapy‐resistant and ‐sensitive lncRNAs, SNHG1 and UBL7‐AS1 promote glioblastoma cell proliferation
Source: Hindawi journal article supplement (doi:10.1155/2022/2623599), 2022-01-01
Supplement: f7 [file 2623599.f7.pdf]

**Supplemental Table 2. Fifty-one commonly dysregulated lncRNAs in glioblastoma in both datasets GSE50161 and GSE4290**

|               | DATASET      | GSE50161 |            | GSE4290 |            |              |                                                   |
|---------------|--------------|----------|------------|---------|------------|--------------|---------------------------------------------------|
| lncRNA name   | ID           | P.Value  | logFC      | P.Value | logFC      | Gene.symbol  | Gene.title                                        |
| RFPL1S        | 214120_at    | 0.000    | -5.7220786 | 0.000   | -3.8370308 | RFPL1S       | RFPL1 antisense RNA 1                             |
| LINC00320     | 1557481_a_at | 0.007    | -1.6244718 | 0.000   | -3.0860473 | LINC00320    | long intergenic non-protein coding RNA 320        |
| LINC00507     | 1557475_at   | 0.000    | -4.3201239 | 0.000   | -3.0737302 | LINC00507    | long intergenic non-protein coding RNA 507        |
| MIR7-3HG      | 223913_s_at  | 0.000    | -4.8059049 | 0.000   | -2.875604  | MIR7-3HG     | MIR7-3 host gene                                  |
| HAR1A         | 1557098_s_at | 0.000    | -3.238709  | 0.000   | -2.8728801 | HAR1A        | highly accelerated region 1A (non-protein coding) |
| SLC26A4-AS1   | 1557107_at   | 0.000    | -3.7194729 | 0.000   | -2.8130842 | SLC26A4-AS1  | SLC26A4 antisense RNA 1                           |
| TMEM191A      | 223628_at    | 0.000    | -2.7283786 | 0.000   | -2.7848504 | TMEM191A     | transmembrane protein 191A (pseudogene)           |
| JAZF1-AS1     | 1559650_at   | 0.000    | -1.1643842 | 0.000   | -2.7817697 | JAZF1-AS1    | JAZF1 antisense RNA 1                             |
| RP11-434B12.1 | 236166_at    | 0.000    | -5.4227062 | 0.000   | -2.4895761 | LOC285147    | uncharacterized LOC285147                         |
| SNAI3-AS1     | 1568683_at   | 0.000    | -1.2078559 | 0.000   | -2.329242  | SNAI3-AS1    | SNAI3 antisense RNA 1                             |
| RP11-430B1.2  | 215229_at    | 0.000    | -1.5937564 | 0.000   | -2.1836281 | LOC100129973 | uncharacterized LOC100129973                      |
| DCTN1-AS1     | 1557617_at   | 0.000    | -3.9458409 | 0.000   | -2.0495064 | DCTN1-AS1    | DCTN1 antisense RNA 1                             |
| DPP10-AS1     | 236351_at    | 0.000    | -3.0467243 | 0.000   | -1.9959408 | DPP10-AS1    | DPP10 antisense RNA 1                             |
| RP11-588K22.2 | 227235_at    | 0.000    | -2.6031656 | 0.000   | -1.8572057 | GUCY1A3      | guanylate cyclase 1 soluble subunit alpha         |
| RP11-490M8.1  | 236656_s_at  | 0.000    | -2.4345127 | 0.000   | -1.8512637 | LOC100288911 | uncharacterized LOC100288911                      |
| KB-1460A1.5   | 213776_at    | 0.000    | -3.4639081 | 0.000   | -1.8301835 | LOC157562    | uncharacterized LOC157562                         |
| LINC00622     | 1558404_at   | 0.000    | -3.2198077 | 0.000   | -1.7724132 | LINC00622    | long intergenic non-protein coding RNA 622        |
| RP1-232L24.3  | 240974_at    | 0.000    | -1.2310855 | 0.000   | -1.7242063 | LOC100506851 | uncharacterized LOC100506851                      |

|               |              |       |            |       |            |                                                                                       |                                                                                                                                                                                                                                                               |
|---------------|--------------|-------|------------|-------|------------|---------------------------------------------------------------------------------------|---------------------------------------------------------------------------------------------------------------------------------------------------------------------------------------------------------------------------------------------------------------|
| Inc-ZNF71-1   | 1557430_at   | 0.000 | -3.8065703 | 0.000 | -1.6997317 | SMIM17                                                                                | small integral membrane protein 17                                                                                                                                                                                                                            |
| LINC01123     | 235083_at    | 0.000 | -3.9396827 | 0.000 | -1.6811895 | LINC01123///LINC01106                                                                 | long intergenic non-protein coding RNA 1123///long intergenic non-protein coding RNA 1106                                                                                                                                                                     |
| AC096772.6    | 235360_at    | 0.000 | -1.7690117 | 0.000 | -1.5406708 | PLEKHM3                                                                               | pleckstrin homology domain containing M3                                                                                                                                                                                                                      |
| TRHDE-AS1     | 1560698_a_at | 0.000 | -3.600933  | 0.000 | -1.5359174 | TRHDE-AS1                                                                             | TRHDE antisense RNA 1                                                                                                                                                                                                                                         |
| VSTM2A-OT1    | 1560692_at   | 0.000 | -3.4528555 | 0.000 | -1.4108019 | VSTM2A-OT1///VSTM2A                                                                   | VSTM2A overlapping transcript 1///V-set and transmembrane domain containing 2A                                                                                                                                                                                |
| PRKAG2-AS1    | 229156_s_at  | 0.005 | -1.7567494 | 0.000 | -1.1883775 | PRKAG2-AS1                                                                            | PRKAG2 antisense RNA 1                                                                                                                                                                                                                                        |
| EMX2OS        | 232531_at    | 0.001 | -2.2410409 | 0.000 | -1.1595829 | EMX2OS                                                                                | EMX2 opposite strand/antisense RNA                                                                                                                                                                                                                            |
| LINC-PINT     | 228702_at    | 0.000 | -1.5776107 | 0.000 | -1.1182049 | LINC-PINT                                                                             | long intergenic non-protein coding RNA, p53 induced transcript                                                                                                                                                                                                |
| GS1-358P8.4   | 228959_at    | 0.000 | -1.5865295 | 0.000 | -1.099731  | PDK3                                                                                  | pyruvate dehydrogenase kinase 3                                                                                                                                                                                                                               |
| LINC01102     | 230495_at    | 0.015 | -1.7675883 | 0.000 | -1.0723266 | LINC01102                                                                             | long intergenic non-protein coding RNA 1102                                                                                                                                                                                                                   |
| MIR600HG      | 223522_at    | 0.000 | -3.2773305 | 0.000 | -1.0720137 | MIR600///MIR600HG                                                                     | microRNA 600///MIR600 host gene                                                                                                                                                                                                                               |
| DGCR5         | 228804_at    | 0.000 | -4.0952272 | 0.000 | -1.0100451 | DGCR5                                                                                 | DiGeorge syndrome critical region gene 5 (non-protein coding)                                                                                                                                                                                                 |
| LINC01268     | 1557359_at   | 0.000 | 2.4945246  | 0.001 | 1.0429209  | LINC01268                                                                             | long intergenic non-protein coding RNA 1268                                                                                                                                                                                                                   |
| RP11-4O1.2    | 236769_at    | 0.000 | 2.5927374  | 0.000 | 1.0888769  | LOC158402                                                                             | uncharacterized LOC158402                                                                                                                                                                                                                                     |
| LINC00511     | 227452_at    | 0.000 | 2.7758248  | 0.000 | 1.1215444  | LINC00673///LINC00511                                                                 | long intergenic non-protein coding RNA 673///long intergenic non-protein coding RNA 511                                                                                                                                                                       |
| UBL7-AS1      | 239792_at    | 0.001 | 1.2399995  | 0.000 | 1.1330232  | UBL7-AS1                                                                              | UBL7 antisense RNA 1 (head to head)                                                                                                                                                                                                                           |
| RP11-394A14.2 | 1553614_a_at | 0.030 | 1.266249   | 0.004 | 1.1555993  | LINC01198                                                                             | long intergenic non-protein coding RNA 1198                                                                                                                                                                                                                   |
| LINC01116     | 228564_at    | 0.008 | 2.7197239  | 0.002 | 1.17112    | LINC01116                                                                             | long intergenic non-protein coding RNA 1116                                                                                                                                                                                                                   |
| SNHG1         | 224610_at    | 0.000 | 1.3601162  | 0.000 | 1.1873876  | SNHG1///SNORD22///SNORD25///SNORD26///SNORD27///SNORD28///SNORD30///SNORD31///SNORD29 | small nucleolar RNA host gene 1///small nucleolar RNA, C/D box 22///small nucleolar RNA, C/D box 25///small nucleolar RNA, C/D box 26///small nucleolar RNA, C/D box 27///small nucleolar RNA, C/D box 28///small nucleolar RNA, C/D box 30///small nucleolar |

|               |              |       |           |       |           |                                        |                                                                                                                                                            |
|---------------|--------------|-------|-----------|-------|-----------|----------------------------------------|------------------------------------------------------------------------------------------------------------------------------------------------------------|
|               |              |       |           |       |           |                                        | RNA, C/D box 31///small nucleolar RNA, C/D box 29                                                                                                          |
| LINC00152     | 225799_at    | 0.000 | 3.2508298 | 0.000 | 1.2458158 | LOC101930489///MIR4435-2HG///LINC00152 | uncharacterized LOC101930489///MIR4435-2 host gene///long intergenic non-protein coding RNA 152                                                            |
| Inc-INADL-2   | 214295_at    | 0.005 | 1.8383054 | 0.000 | 1.3213208 | KIAA0485                               | uncharacterized LOC57235                                                                                                                                   |
| LINC01114     | 239879_at    | 0.002 | 1.4042408 | 0.000 | 1.3862362 | LINC01114                              | long intergenic non-protein coding RNA 1114                                                                                                                |
| PVT1          | 1558290_a_at | 0.000 | 2.6282537 | 0.000 | 1.3953128 | MIR1204///PVT1                         | microRNA 1204///Pvt1 oncogene (non-protein coding)                                                                                                         |
| ncTr-NBPF1    | 227926_s_at  | 0.000 | 2.7324051 | 0.000 | 1.3965054 | NBPF20                                 | neuroblastoma breakpoint family member 20                                                                                                                  |
| HOTAIR        | 239153_at    | 0.036 | 1.0875604 | 0.001 | 1.4623241 | HOTAIR                                 | HOX transcript antisense RNA                                                                                                                               |
| PSMB8-AS1     | 1555852_at   | 0.000 | 3.5606113 | 0.000 | 1.4782343 | PSMB8-AS1                              | PSMB8 antisense RNA 1 (head to head)                                                                                                                       |
| MIR210HG      | 230710_at    | 0.024 | 1.1669203 | 0.000 | 1.567502  | MIR210HG                               | MIR210 host gene                                                                                                                                           |
| HCP5          | 206082_at    | 0.005 | 1.4510557 | 0.000 | 1.599913  | HCP5                                   | HLA complex P5 (non-protein coding)                                                                                                                        |
| RP11-834C11.4 | 226582_at    | 0.000 | 2.6795611 | 0.000 | 1.6005364 | LOC400043                              | uncharacterized LOC400043                                                                                                                                  |
| TBX2-AS1      | 1555216_a_at | 0.011 | 1.8046834 | 0.000 | 1.7596987 | LOC101060604///SLC7A5P2///SLC7A5P1     | putative L-type amino acid transporter 1-like protein IMAA///solute carrier family 7 member 5 pseudogene 2///solute carrier family 7 member 5 pseudogene 1 |
| Inc-ADAM30-1  | 214722_at    | 0.000 | 1.4423181 | 0.000 | 2.0086839 | NOTCH2NL                               | notch 2 N-terminal like                                                                                                                                    |
| MIR155HG      | 229437_at    | 0.003 | 2.0848099 | 0.000 | 2.0263015 | MIR155///MIR155HG                      | microRNA 155///MIR155 host gene                                                                                                                            |
| H19           | 224646_x_at  | 0.002 | 3.6363716 | 0.000 | 2.7537401 | MIR675///H19                           | microRNA 675///H19, imprinted maternally expressed transcript (non-protein coding)                                                                         |
